# Supplementary material for: Healing filler–matrix interfaces in drawn BN/UHMWPE composites by a simple thermal annealing treatment
Source: Royal Society of Chemistry journal article supplement (doi:10.1039/d4lp00349g), 2025-01-01
Supplement: d4lp00349g1.pdf [file d4lp00349g1.pdf]

### Supplementary Information

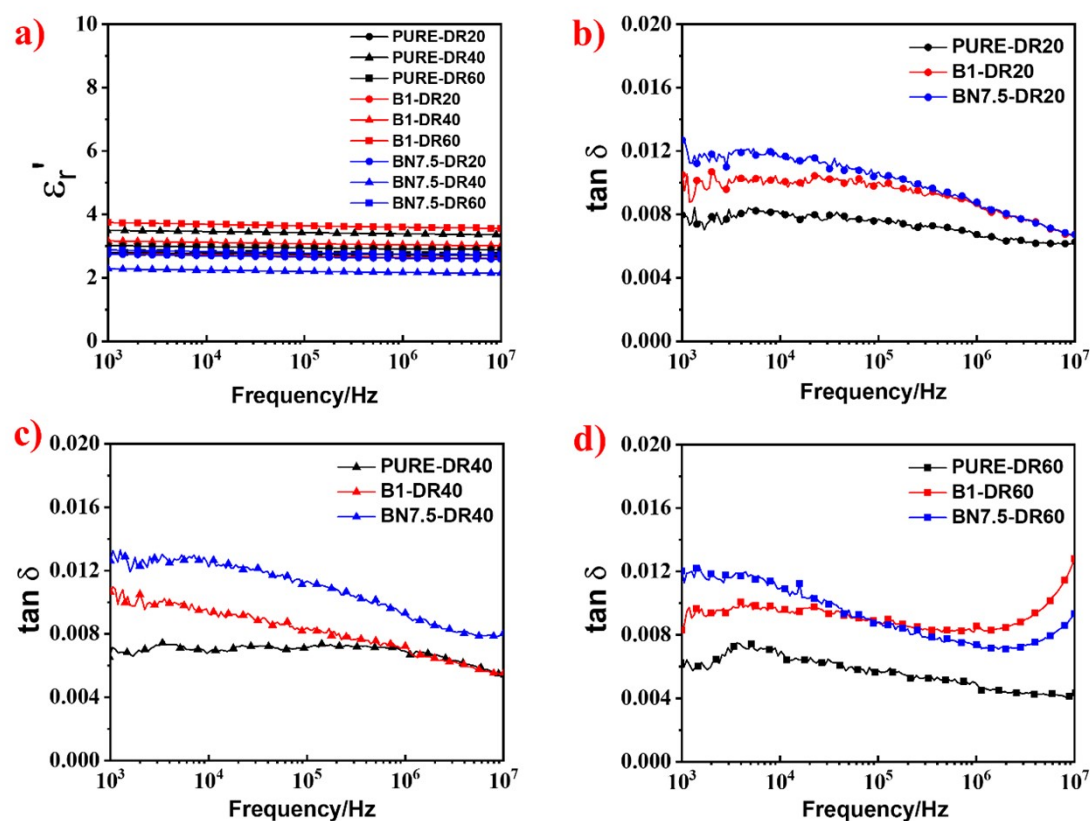

**Figure S1.** Dielectric constant and loss of the drawn pure UHMPWE and BN/UHMPWE composites with different filler concentration and draw ratios, in the frequency between  $10^3$  and  $10^7$  Hz.

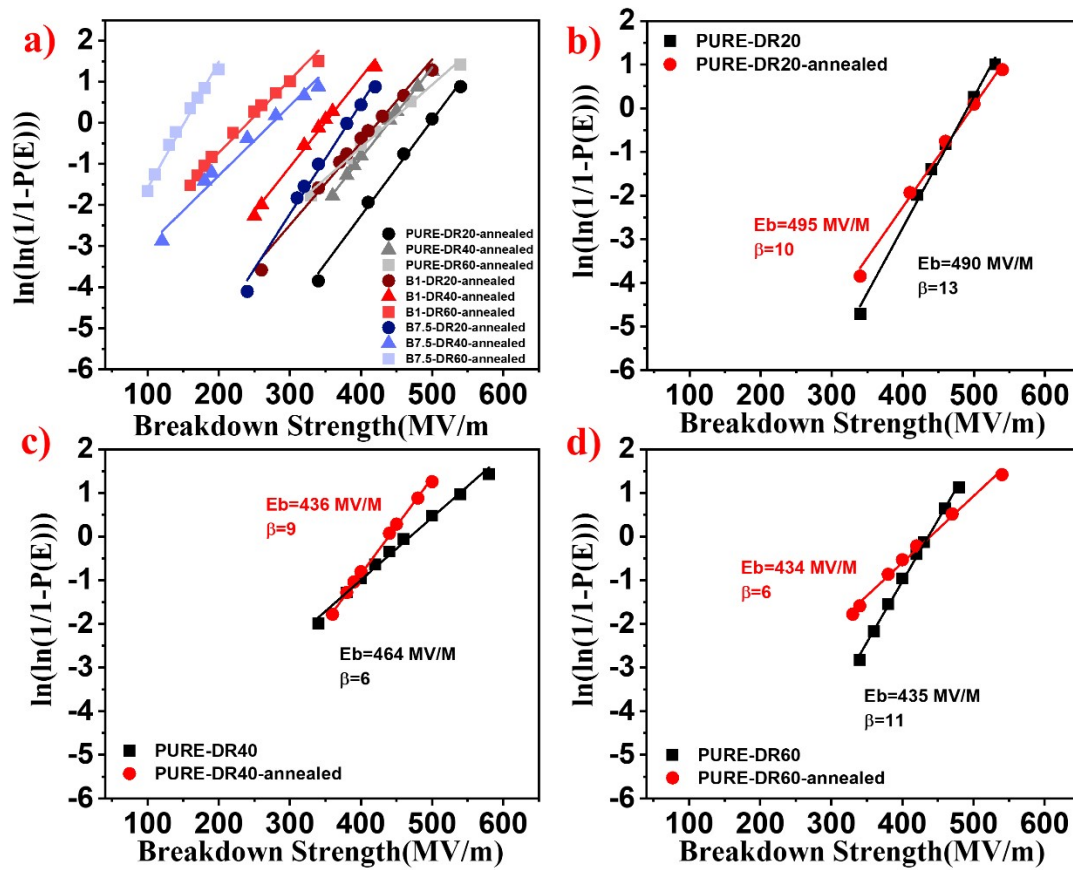

**Figure S2.** a) Weibull distribution of the breakdown strength of drawn pure UHMPWE and BN/UHMWPE composites films with 0, 1, 7.5wt% BN, after the anneal treatment. b-c) Comparison of the breakdown strength of pure UHMWPE with different draw ratios.

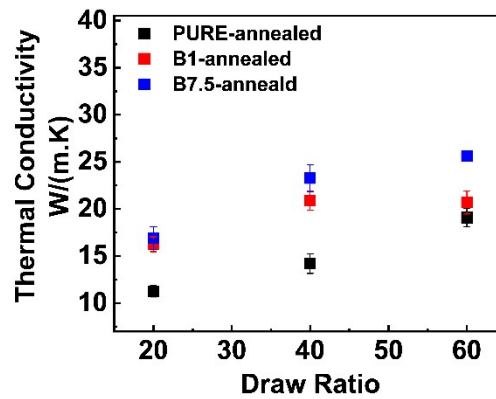

**Figure S3.** The thermal conductivity of drawn pure UHMPWE and BN/UHMWPE composites after annealing treatment.

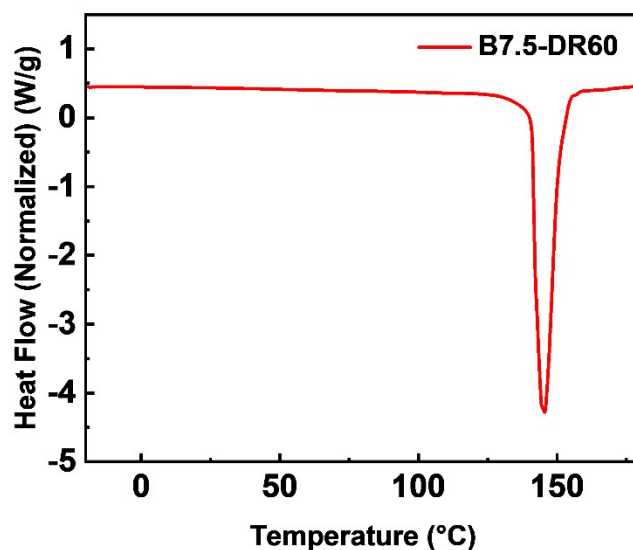

**Figure S4.** The normalized heat flow of sample B7.5-DR60 along with the temperature during the heating cycle of the DSC scans at a heating rate of  $10^{\circ}\text{C}\cdot\text{min}^{-1}$ , the peak at  $145^{\circ}\text{C}$  denotes the melting point. This was measured by by differential scanning calorimetry (DSC) (DSC 25, TA instrument). The B7.5-DR60 sample was heated from  $-20^{\circ}\text{C}$  to  $180^{\circ}\text{C}$  under a  $\text{N}_2$  atmosphere and a heating rate of  $10^{\circ}\text{C}\cdot\text{min}^{-1}$ .

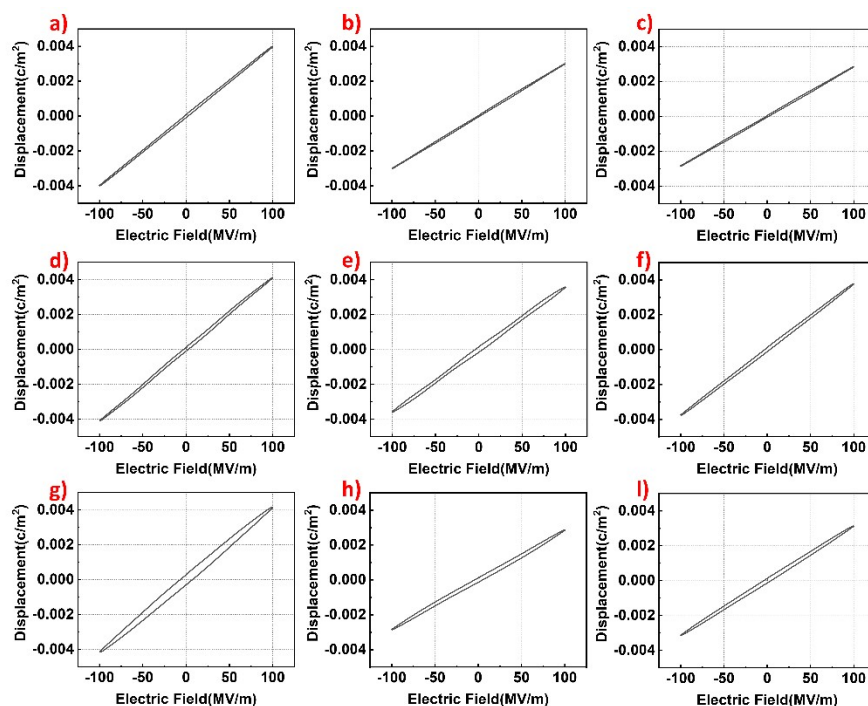

**Figure S5.** D-E loop at  $100\text{MV/m}$  of drawn pure UHMWPE and BN/UHMWPE composites before anneal treatment. From the left to the right: films with draw ratio of 20, 40 and 60; From top to the bottom: films with 0, 1, 7.5wt% BN fillers

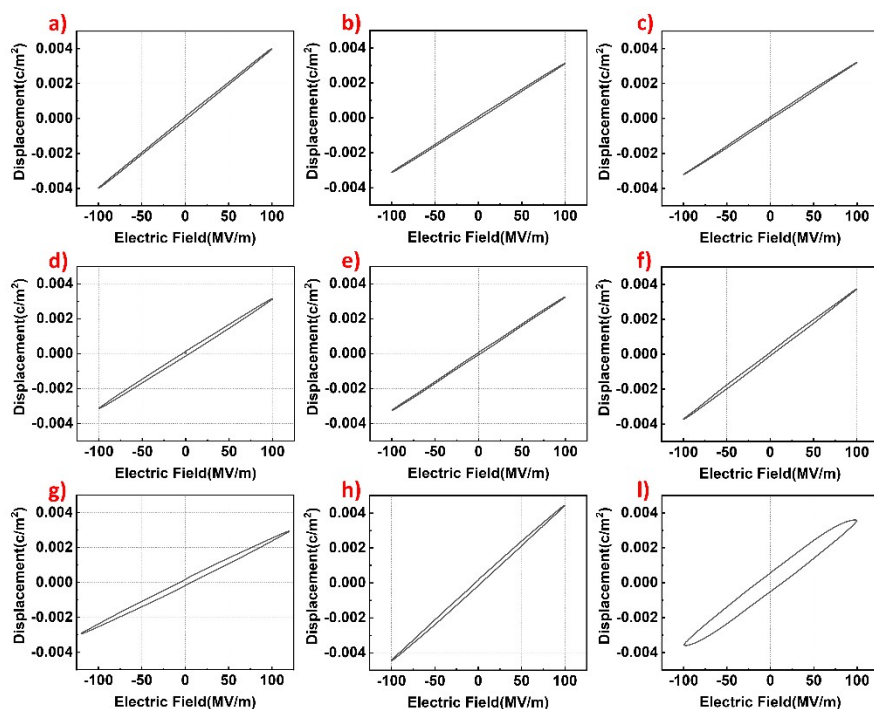

**Figure S6.** D-E loop at 100MV/m of drawn pure UHMPWE and BN/UHMPWE composites after anneal treatment. From the left to the right: films with draw ratio of 20, 40 and 60; From top to the bottom: films with 0, 1, 7.5wt% BN fillers

**Table S1.** A summary of the fabricated films with different filler concentrations and draw ratios. (refer to section 2.2 of the manuscript for denotation of the abbreviations)

| Draw Ratio \ BN/wt% | 20        | 40        | 60        |
|---------------------|-----------|-----------|-----------|
| 0                   | PURE-DR20 | PURE-DR40 | PURE-DR60 |
| 1                   | B1-DR20   | B1-DR40   | B1-DR60   |
| 7.5                 | B7.5-DR20 | B7.5-DR20 | B7.5-DR20 |

**Table S2.** A summary of the characteristic breakdown strength ( $E_b$ ) and  $b$  of the drawn pure UHMWPE and BN/UHMWPE composites films before and after anneal treatment, calculated from Weibull distribution.

|           | $E_b$  | $b$ |
|-----------|--------|-----|
|           | (MV/m) |     |
| PURE-DR20 | 490    | 13  |
| PURE-DR40 | 464    | 6   |

---

|                    |     |    |
|--------------------|-----|----|
| PURE-DR60          | 435 | 11 |
| B1-DR20            | 351 | 7  |
| B1-DR40            | 290 | 7  |
| B1-DR60            | 260 | 4  |
| B7.5-DR20          | 299 | 3  |
| B7.5-DR40          | 288 | 5  |
| B7.5-DR60          | 261 | 5  |
| PURE-DR20-annealed | 495 | 10 |
| PURE-DR40-annealed | 436 | 9  |
| PURE-DR60-annealed | 434 | 6  |
| B1-DR20-annealed   | 421 | 7  |
| B1-DR40-annealed   | 346 | 7  |
| B1-DR60-annealed   | 234 | 4  |
| B7.5-DR20-annealed | 381 | 9  |
| B7.5-DR40-annealed | 266 | 4  |
| B7.5-DR60-annealed | 148 | 4  |

---
